# Supplementary material
Source: publisher site journal article supplement (http://kjim.org/upload/media/kjim-2023-184-Supplementary-Table-2.pdf)
Supplement: Supplementary file 1 [file kjim-2023-184-Supplementary-Table-2.pdf]

**Supplementary Table 2. Newcastle–Ottawa Scale for cohort study quality**

| Study                                       | Year | Selection                                |                                     |                           | Demonstration that outcome of interest was not present at start of study | Comparability of cohorts on the basis of the design or analysis controlled for confounders | Outcome               |                                                 |
|---------------------------------------------|------|------------------------------------------|-------------------------------------|---------------------------|--------------------------------------------------------------------------|--------------------------------------------------------------------------------------------|-----------------------|-------------------------------------------------|
|                                             |      | Representativeness of the exposed cohort | Selection of the non-exposed cohort | Ascertainment of exposure |                                                                          |                                                                                            | Assessment of outcome | Was follow-up long enough for outcomes to occur |
| Hanaoka et al. [21]                         | 2010 | ☆                                        | ☆                                   | ☆                         | ☆                                                                        | ☆                                                                                          | ☆                     | ☆                                               |
| Han et al. [19]                             | 2011 | ☆                                        | ☆                                   | ☆                         | ☆                                                                        | ☆                                                                                          | ☆                     | ☆                                               |
| Maehata et al. [26]                         | 2012 | ☆                                        | ☆                                   | ☆                         | ☆                                                                        | ☆                                                                                          | ☆                     | ☆                                               |
| Iguchi et al. [22],<br>Moribata et al. [23] | 2016 | ☆                                        | ☆                                   | ☆                         | ☆                                                                        | ☆                                                                                          | ☆                     | ☆                                               |
| Kim et al. [25]                             | 2016 | ☆                                        | ☆                                   | ☆                         | ☆                                                                        | ☆                                                                                          | ☆                     | ☆                                               |
| Han et al. [20]                             | 2018 | ☆                                        | ☆                                   | ☆                         | ☆                                                                        | ☆                                                                                          | ☆                     | ☆                                               |
| Oura et al. [27]                            | 2020 | ☆                                        | ☆                                   | ☆                         | ☆                                                                        | ☆                                                                                          | ☆                     | ☆                                               |
| Kato et al. [24]                            | 2021 | ☆                                        | ☆                                   | ☆                         | ☆                                                                        | ☆                                                                                          | ☆                     | ☆                                               |

A study can be given a maximum of one star for each numbered item.
